# Supplementary material
Source: PubMed Central journal article supplement (PMC3839731)
Supplement: 1310905110_pnas.201310905SI.pdf [file 1310905110_pnas.201310905SI.pdf]

# Supporting Information

Yao et al. 10.1073/pnas.1310905110

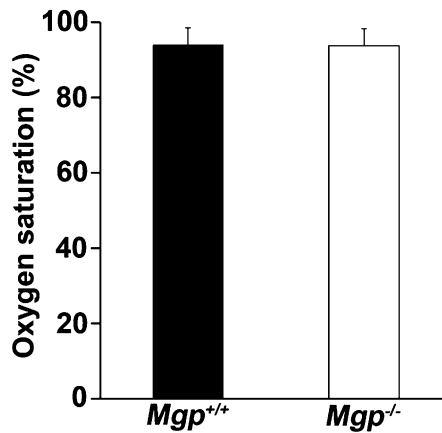

Fig. S1. Oxygen saturation of arterial blood from matrix Gla protein (*Mgp*)<sup>+/+</sup> and *Mgp*<sup>-/-</sup> mice (*n* = 6).

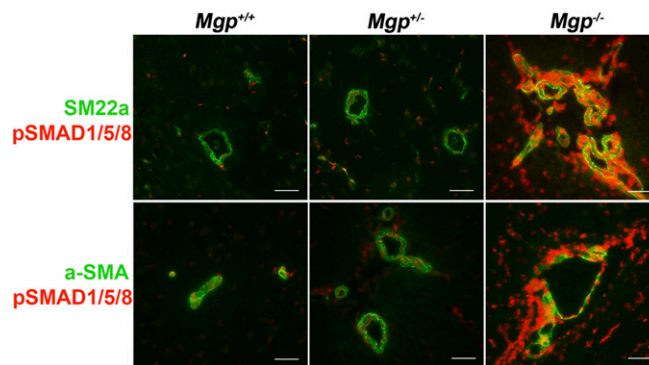

Fig. S2. Localization of phosphorylated (p)SMAD1/5/8 in the brain of *Mgp*<sup>-/-</sup> mice. PSMAD1/5/8 colocalized with smooth muscle protein 22- $\alpha$  (SM22 $\alpha$ ) and  $\alpha$ -smooth muscle actin ( $\alpha$ -SMA). (Scale bar, 100  $\mu$ m).

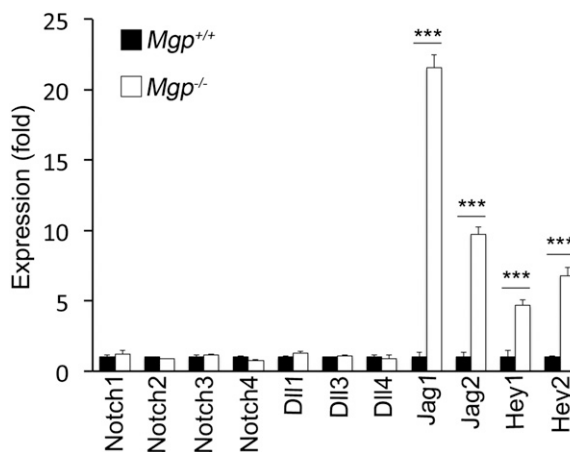

Fig. S3. Expression of Notch and target genes in the brains of *Mgp*<sup>-/-</sup> mice. The expression of Notch1-4, Dll 1, 3, and 4, Jagged (Jag) 1 and 2, and Hey1 and -2 in the brains of *Mgp*<sup>-/-</sup> mice was examined by real-time PCR (*n* = 3). *Mgp*<sup>+/+</sup> mice were used as controls. \*\*\**P* < 0.001.

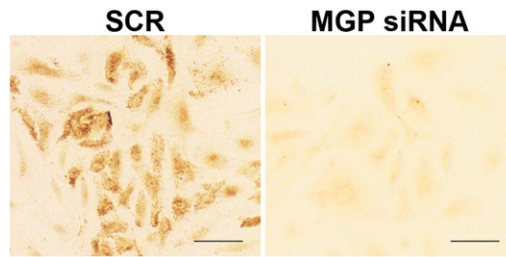

**Fig. S4.** Depletion of matrix Gla protein (MGP) in human brain microvascular endothelial cells (HBMECs) Expression of MGP in HBMECs after transfection of scrambled siRNA and siRNA to MGP, as determined by immunostaining. (Scale bar, 100  $\mu$ m.)

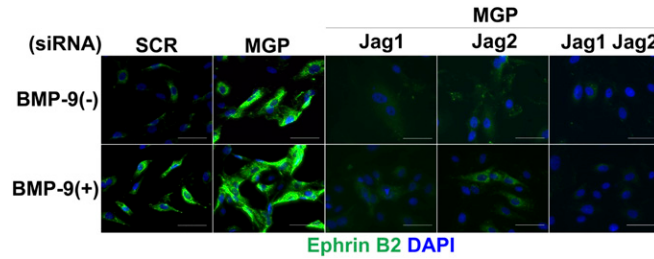

**Fig. S5.** Expression of Ephrin B2 in HBMECs. Expression of Ephrin B2, as determined by immunostaining, after transfection of siRNA to MGP alone or together with siRNA to Jagged 1 (Jag1), Jagged 2 (Jag2), or Jag1 and Jag2, in combination with (+) or without (-) BMP-9 treatment. Scrambled siRNA (SCR) was used as control. (Scale bar, 100  $\mu$ m.)

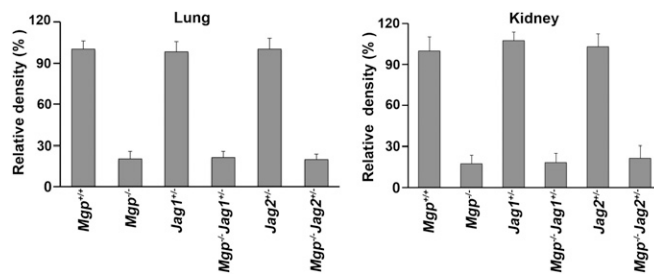

**Fig. S6.** Relative density of retained fluorescence in lungs and kidneys of *Mgp*<sup>+/+</sup>, *Jag1*<sup>+/-</sup>, *Jag2*<sup>+/-</sup>, *Mgp*<sup>-/-</sup>, *Mgp*<sup>-/-</sup>*Jag1*<sup>+/-</sup>, and *Mgp*<sup>-/-</sup>*Jag2*<sup>+/-</sup> mice after UV-fluorescent microsphere injection (*n* = 8).

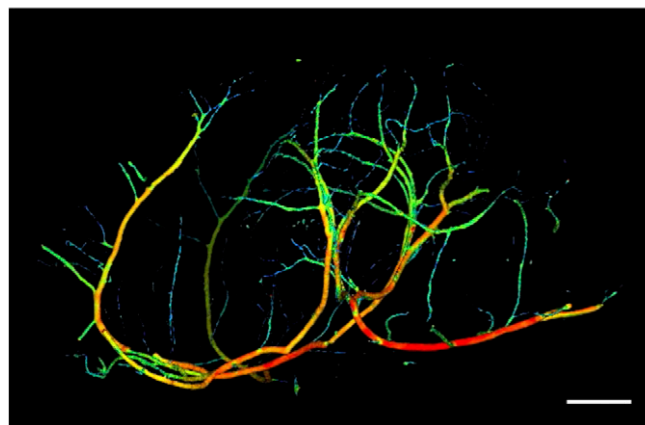

**Movie S1.** *Mgp*<sup>+/+</sup> brain vasculature. Skull bone fragments are visible.

[Movie S1](#)

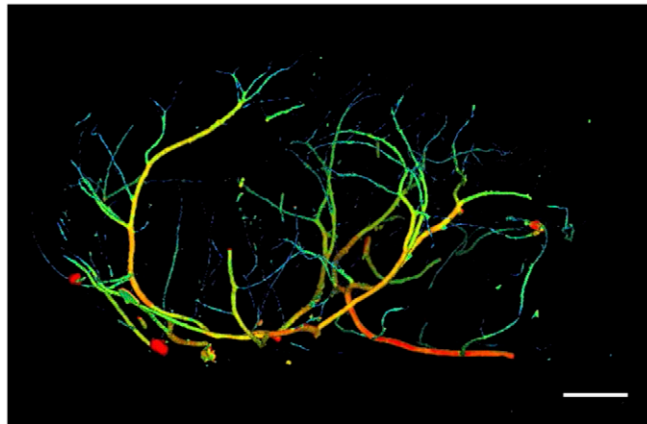

Movie S2. *Mgp*<sup>+/-</sup> brain vasculature. Skull bone fragments are visible.

[Movie S2](#)

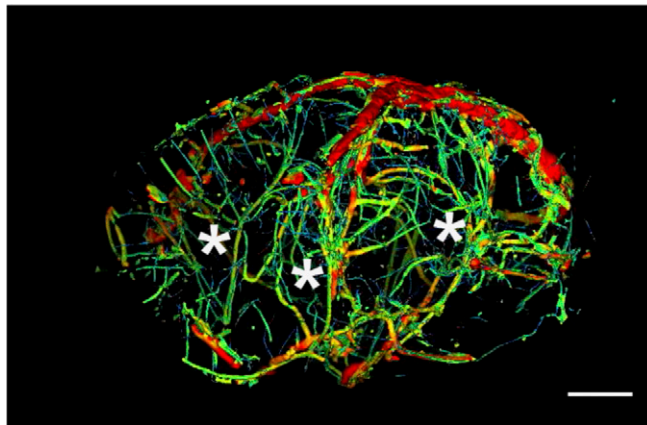

Movie S3. *Mgp*<sup>-/-</sup> brain vasculature.

[Movie S3](#)

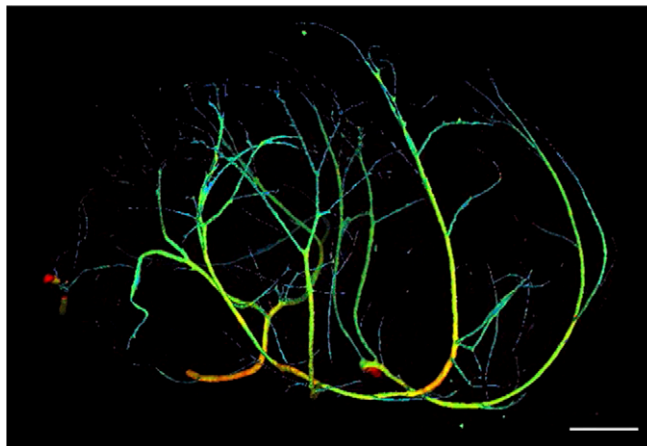

Movie S4. *Mgp*<sup>+/+</sup> brain vasculature.

[Movie S4](#)

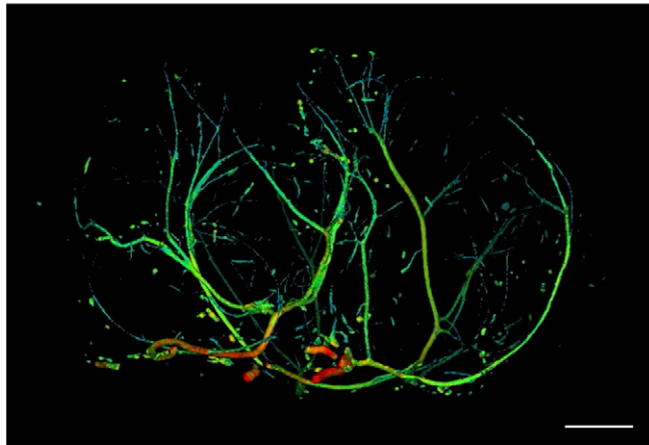

Movie S5. *Mgp<sup>+/+</sup>Jag1<sup>+/-</sup>* brain vasculature.

[Movie S5](#)

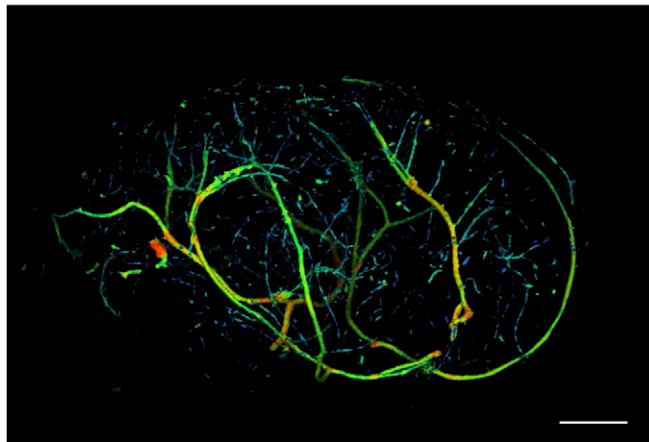

Movie S6. *Mgp<sup>+/+</sup>Jag2<sup>+/-</sup>* brain vasculature.

[Movie S6](#)

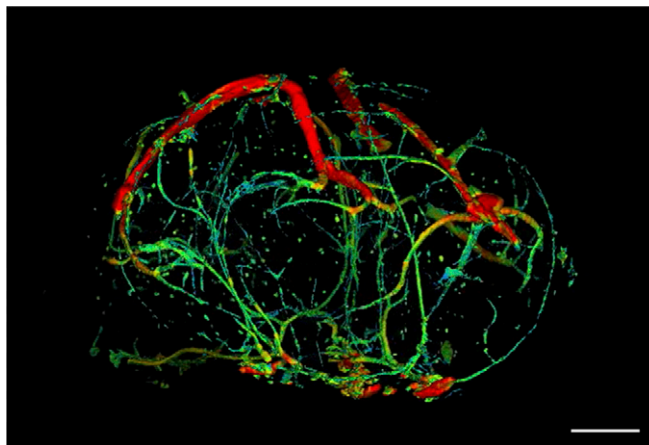

Movie S7. *Mgp<sup>-/-</sup>* brain vasculature. Skull bone fragments are visible.

[Movie S7](#)

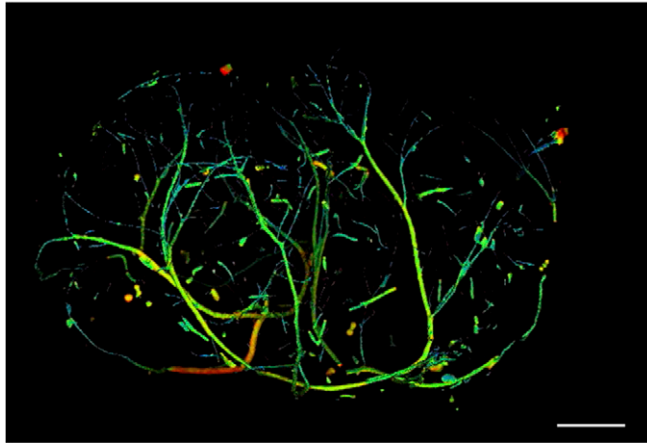

Movie S8. *Mgp*<sup>-/-</sup>*Jag1*<sup>+/-</sup> brain vasculature. Skull bone fragments are visible.

[Movie S8](#)

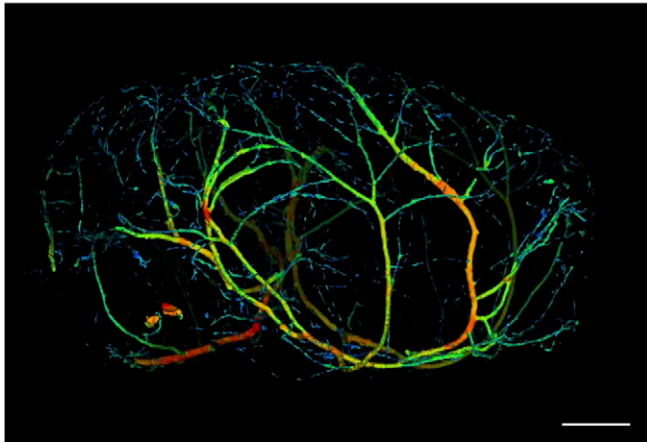

Movie S9. *Mgp*<sup>-/-</sup>*Jag2*<sup>+/-</sup> brain vasculature.

[Movie S9](#)
